# Supplementary material for: Direct observation of C60− nano-ion gas phase ozonation via ion mobility-mass spectrometry
Source: Royal Society of Chemistry journal article supplement (doi:10.1039/c9cp01394f), 2019-01-01
Supplement: c9cp01394f1.pdf [file c9cp01394f1.pdf]

# Direct Observation of $C_{60}^-$ Nano-ion Gas Phase Ozonation via Ion Mobility-Mass Spectrometry

Chenxi Li<sup>1,2</sup>, Christopher J. Hogan Jr<sup>1\*</sup>

<sup>1</sup>Department of Mechanical Engineering, University of Minnesota, Minneapolis, MN  
55455, USA

<sup>2</sup>Laboratory for Physical Chemistry, ETH Zürich, 8093 Zürich, Switzerland

## Supporting Information

\*To whom correspondence should be addressed: hogan108@umn.edu,  
T: 1-612-626-8312

## Information Available

- A schematic diagram of the experimental setup used in this study
- Mobility spectra for  $\text{THA}^+$  and  $\text{C}_{60}^-$
- Method of calculation for the collision rate between  $\text{C}_{60}^-$  and  $\text{O}_3$
- Mass peaks at high ozone mixing ratio

## Experimental Setup

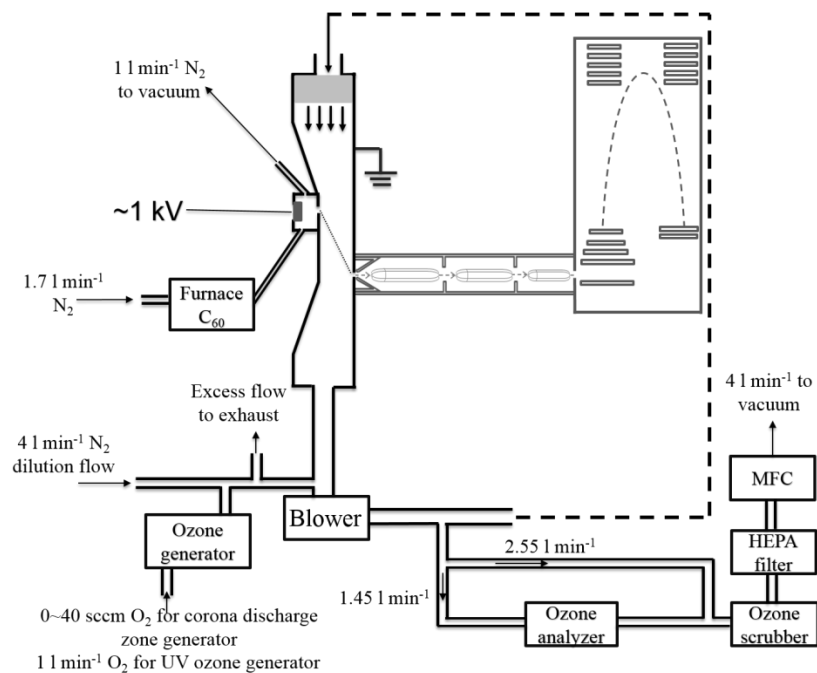

**Figure S1.** A schematic diagram of the experimental setup of the DMA-MS system, including flow rates.

## Mobility spectra for $\text{THA}^+$ and $\text{C}_{60}^-$

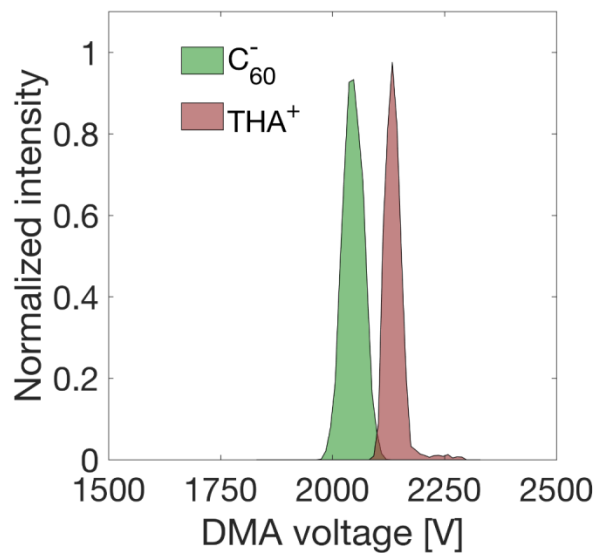

**Figure S2.** The mobility spectra for  $\text{THA}^+$  and  $\text{C}_{60}^-$ ; the  $\text{THA}^+$  spectrum is used in instrument calibration.

## Calculation of collision rate between $C_{60}^-$ and $O_3$

The collision rate coefficient ( $\beta$ ) between  $C_{60}^-$  and  $O_3$  is approximated with the following equations:

$$\beta = \sqrt{\frac{8k_B T}{\pi m_r}} \cdot \pi (r_{O_3} + r_{C_{60}^-})^2 \eta(\psi_D) \quad (S1)$$

$$\eta(\psi_D) = 1 + C\psi_D \quad (S2)$$

$$\psi_D = \frac{ze\mu_D}{4\pi\epsilon_0 k_B T (r_{O_3} + r_{C_{60}^-})^2} \quad (S3)$$

where  $k_B$  is the Boltzmann constant,  $T$  is system temperature,  $m_r$  is the reduced mass of an ozone and a fullerene molecule,  $\eta(\psi_D)$  is the enhancement factor of the collision rate due to ion-dipole interaction,  $\psi_D$  is the ion-dipole energy to thermal energy ratio,  $\mu_D$  is the dipole moment of ozone (0.53D), and  $\epsilon_0$  is the vacuum permittivity.  $r_{O_3}$  and  $r_{C_{60}^-}$  are radii of ozone and  $C_{60}^-$  and they were estimated to be 1.099 nm and 0.483 nm, respectively. The condensed phase bulk densities of ozone ( $1354 \text{ kg m}^{-3}$ )<sup>1</sup> and  $C_{60}$  ( $1720 \text{ kg m}^{-3}$ ) were utilized in this calculation, assuming that both ozone and  $C_{60}$  can be treated as spheres without inducing significant errors in the final collision rate calculation. With these radii values,  $\psi_D$  has a value of 0.248, indicating the influence of the ion-dipole potential is modest.  $C$  is approximated with a value 0.6, i.e. we approximate that the ozone dipole moment is aligned with the directional vector between  $O_3$  and  $C_{60}^-$  for 60% of its trajectory. While this is a rough approximation, it vastly simplifies estimation of the collision rate coefficient, and is intermediate to its upper and lower limits (1.0 and 0.0, respectively).

## Mass Peaks at High Ozone Mixing Ratio

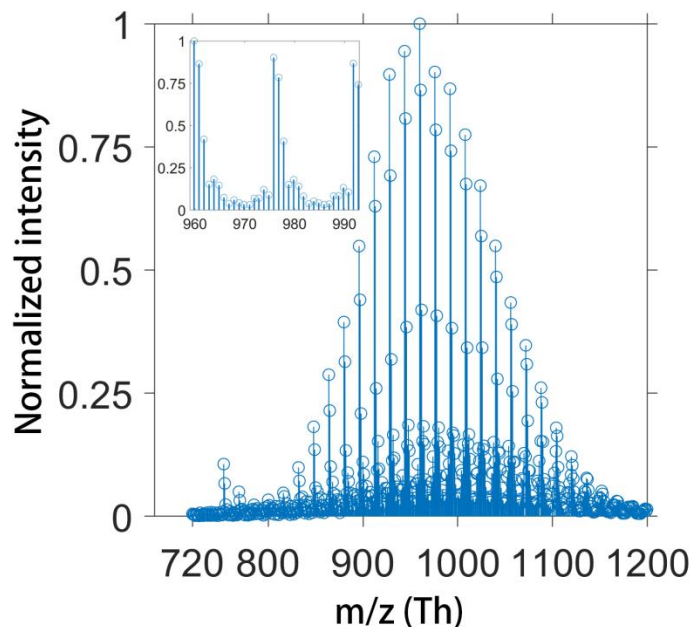

**Figure S3.** An example mass spectrum at an ozone mixing ratio of 171 ppm, with circles indicating local maxima of signal intensities (as opposed to integrated ion signals). The inset figure shows a portion of the main figure to illustrate the pattern of the mass peaks.

Reaction mechanisms other than sequential oxygen addition become more important as ozone concentration increases. To illustrate this, Figure S3 shows the local intensity maxima of the mass spectra at an ozone mixing ratio of 171 ppm. Since the ion signals are not integrated, Figure S3 exhibits deviations from isotropic patterns expected from integrated ion signals. However, peaks corresponding to  $C_{60}O_n^-$ ,  $C_{60}O_n^-+4$  Da,  $C_{60}O_n^-+8$  Da,  $C_{60}O_n^-+12$  Da and  $C_{60}O_n^-+14$  Da are clearly present in the spectra. As is explained in the main text, formation of  $C_{60}O_n^-+4$  Da,  $C_{60}O_n^-+8$  Da,  $C_{60}O_n^-+12$  Da peaks can be (partially) attributed to the loss of CO or CO<sub>2</sub> from

the reaction products, while the  $C_{60}O_n^{-}+14$  Da peaks may arise from reactions involving contaminants within the DMA sheath tubing.

1. R. I. Brabets and J. M. McDonough, *The Journal of Chemical Physics*, 1957, **27**, 880-882.
